# Supplementary material
Source: PubMed Central journal article supplement (PMC5606306)
Supplement: DC170885SupplementaryData.pdf [file DC170885SupplementaryData.pdf]

SUPPLEMENTARY DATA

**Supplementary Figure 1. Eligibility, randomization, and follow-up of SPRINT participants among those with prediabetes and normoglycemia at baseline**

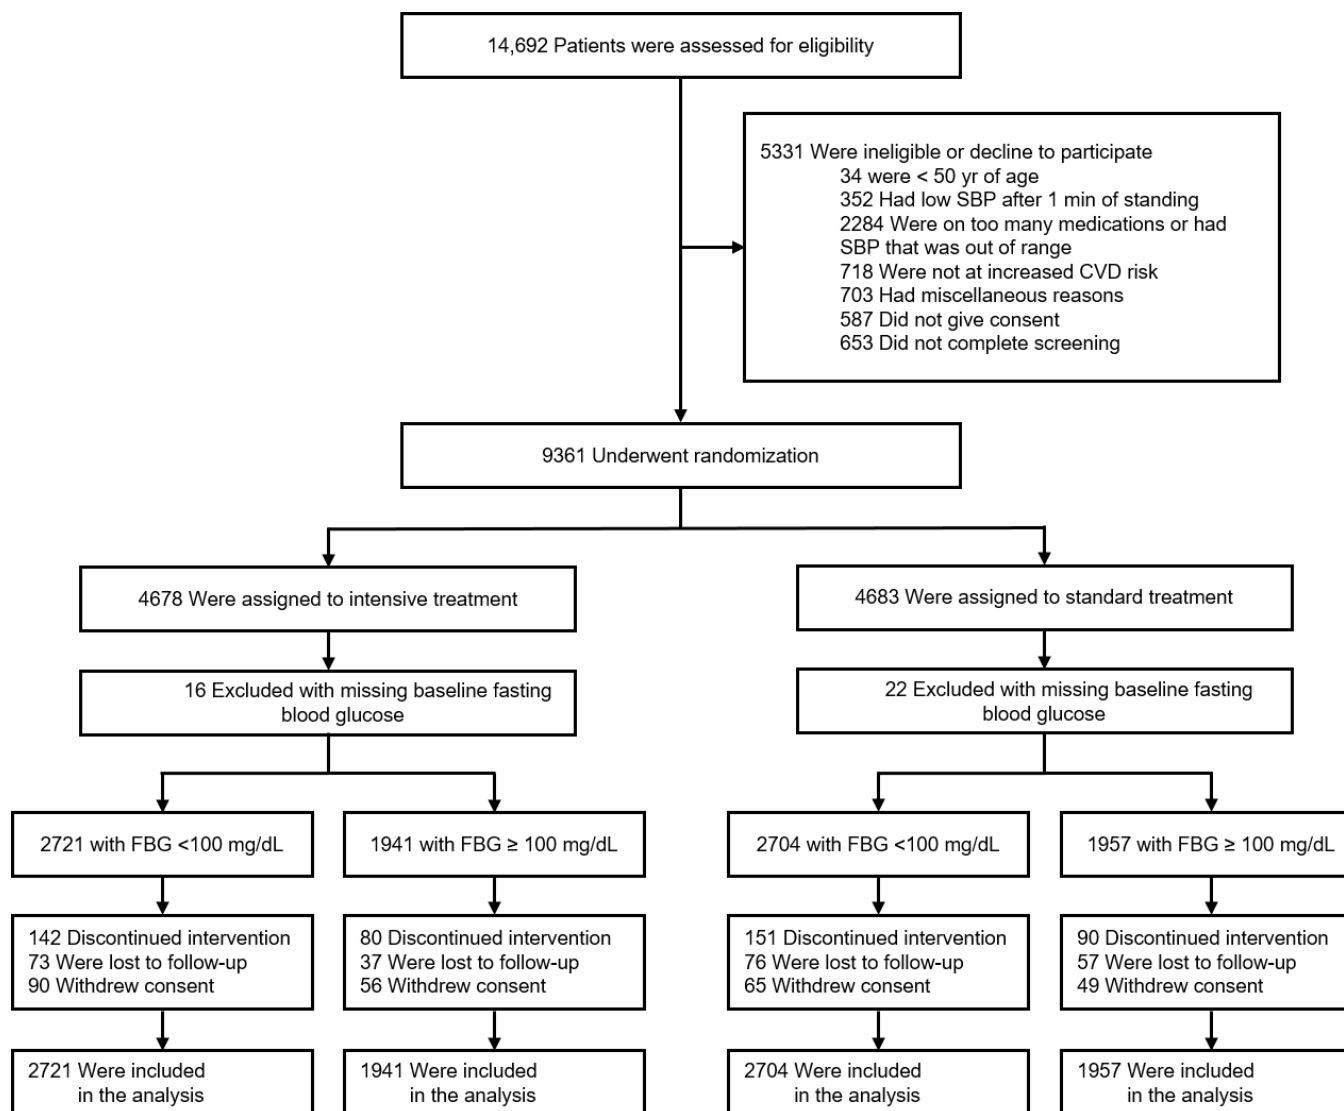

SUPPLEMENTARY DATA

**Supplementary Figure 2. Fasting serum glucose in the two treatment arms over the course of the trial among those with prediabetes and normoglycemia.**

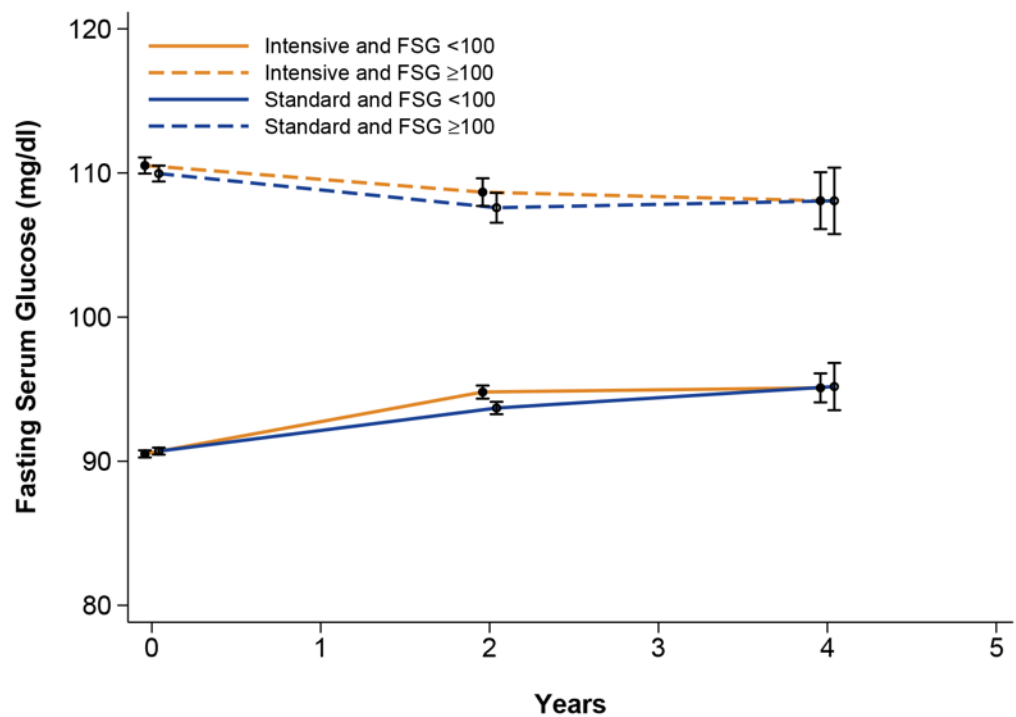

SUPPLEMENTARY DATA

**Supplementary Figure 3. Systolic blood pressure in the intensive and standard treatment arms over the course of the trial among those with normoglycemia (Panel A) and with prediabetes (Panel B) at baseline.**

The mean number of medications is the number of antihypertensive medications administered at study each visit. I bars represent 95% confidence intervals.

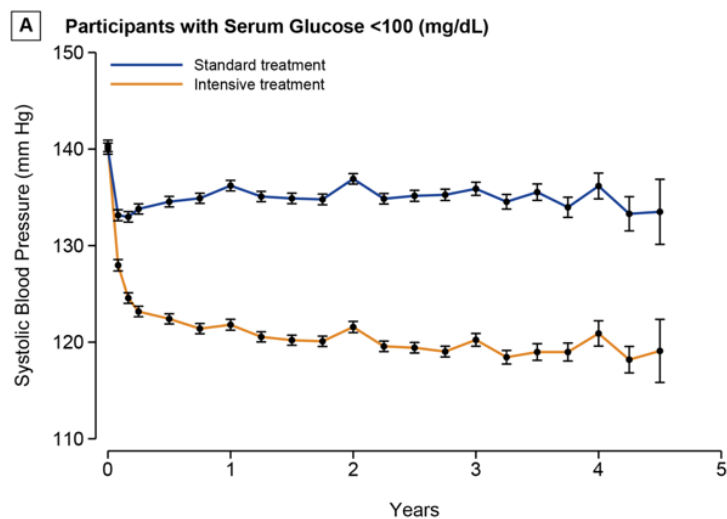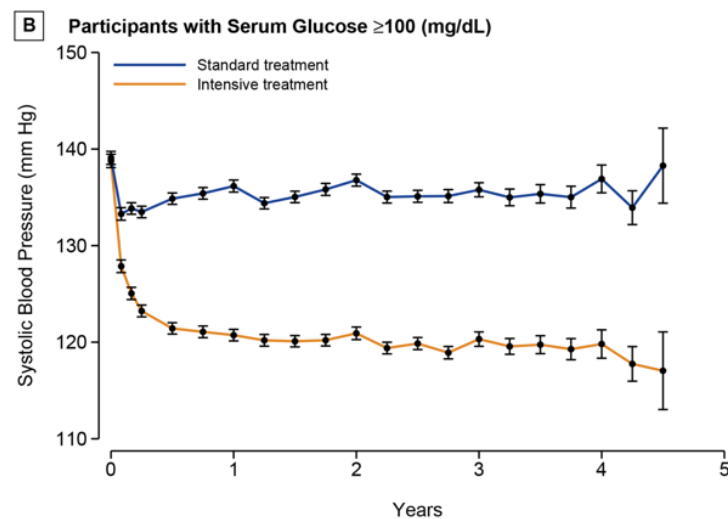

Mean No. of Medications

|                     |     |     |     |     |     |     |     |     |     |     |
|---------------------|-----|-----|-----|-----|-----|-----|-----|-----|-----|-----|
| Standard treatment  | 1.9 | 1.7 | 1.7 | 1.7 | 1.8 | 1.8 | 1.8 | 1.8 | 1.7 | 1.9 |
| Intensive treatment | 2.2 | 2.6 | 2.7 | 2.7 | 2.7 | 2.7 | 2.7 | 2.7 | 2.8 | 3.0 |

Mean No. of Medications

|                     |     |     |     |     |     |     |     |     |     |     |
|---------------------|-----|-----|-----|-----|-----|-----|-----|-----|-----|-----|
| Standard treatment  | 2.0 | 1.9 | 1.8 | 1.8 | 1.9 | 1.9 | 1.9 | 1.9 | 1.9 | 1.9 |
| Intensive treatment | 2.3 | 2.8 | 2.9 | 2.9 | 2.9 | 2.9 | 2.9 | 3.0 | 2.9 | 2.9 |

SUPPLEMENTARY DATA

**Supplementary Figure 4. Hazard ratios for the primary outcome with intensive vs. standard treatment across a range of baseline fasting serum glucose as a continuous variable using restricted cubic splines.**

The solid blue line represents the hazard ratio, and the grey shaded area represents the 95% CI. The histogram represents the distribution of baseline fasting serum glucose in SPRINT.

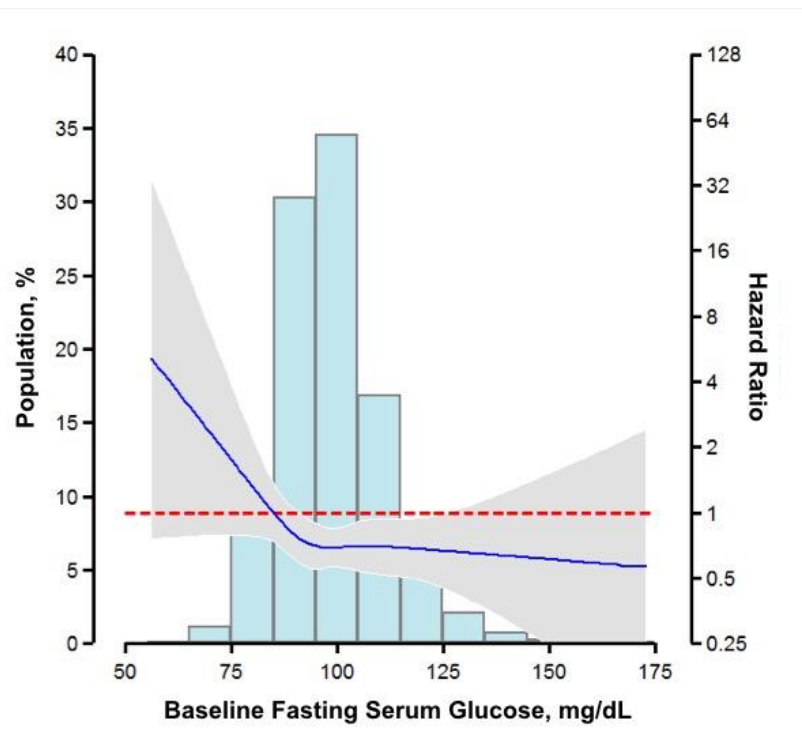

SUPPLEMENTARY DATA

**Supplementary Table 1. Baseline fasting serum glucose cross classified with year 2 follow-up visit fasting serum glucose.**

| Baseline Serum Glucose, mg/dL | Year 2 Fasting Serum Glucose, mg/dL |       |           |       | Total |
|-------------------------------|-------------------------------------|-------|-----------|-------|-------|
|                               | Missing                             | < 100 | 100 – 125 | > 125 |       |
| < 100                         | 752                                 | 3485  | 1134      | 54    | 5425  |
| 100-125                       | 419                                 | 1015  | 1925      | 244   | 3603  |
| > 125                         | 43                                  | 29    | 126       | 97    | 295   |
| <b>Total</b>                  | 1214                                | 4529  | 3185      | 395   | 9323  |

**Supplementary Table 2. Fasting serum glucose values at baseline, 24 months and 48 months post-randomization by treatment arm among those above and below a baseline fasting serum glucose of 100 mg/dL**

| Baseline Serum glucose Group | Randomized Group Assignment | Time Point | N    | Mean, mg/dL | 95% CI lower bound, mg/dL | 95% CI upper bound, mg/dL |
|------------------------------|-----------------------------|------------|------|-------------|---------------------------|---------------------------|
| < 100 mg/dL                  | Standard                    | Baseline   | 2704 | 90.70       | 90.46                     | 90.94                     |
|                              |                             | 24 months  | 2325 | 93.69       | 93.26                     | 94.12                     |
|                              |                             | 48 months  | 545  | 95.18       | 93.54                     | 96.82                     |
|                              | Intensive                   | Baseline   | 2721 | 90.51       | 90.26                     | 90.75                     |
|                              |                             | 24 months  | 2348 | 94.80       | 94.34                     | 95.25                     |
|                              |                             | 48 months  | 603  | 95.09       | 94.08                     | 96.09                     |
| ≥ 100 mg/dL                  | Standard                    | Baseline   | 1957 | 109.96      | 109.41                    | 110.51                    |
|                              |                             | 24 months  | 1707 | 107.59      | 106.55                    | 108.62                    |
|                              |                             | 48 months  | 455  | 108.07      | 105.76                    | 110.37                    |
|                              | Intensive                   | Baseline   | 1941 | 110.52      | 109.96                    | 111.08                    |
|                              |                             | 24 months  | 1729 | 108.67      | 107.71                    | 109.63                    |
|                              |                             | 48 months  | 435  | 108.08      | 106.11                    | 110.05                    |

SUPPLEMENTARY DATA

Supplementary Table 3. Interaction analysis between treatment arm and baseline fasting serum glucose status for the primary outcome

| Baseline fasting serum glucose | Randomized Treatment Arm |                               |                  |                               | HR (95% CI) for treatment arm within strata of baseline fasting serum glucose |
|--------------------------------|--------------------------|-------------------------------|------------------|-------------------------------|-------------------------------------------------------------------------------|
|                                | Standard                 |                               | Intensive        |                               |                                                                               |
|                                | N event/no event         | Hazard Ratio (95% CI)         | N event/no event | Hazard Ratio (95% CI)         |                                                                               |
| < 100 mg/dL                    | 174/2530<br>6.3%         | 1.0 (reference)               | 142/2579<br>5.0% | 0.82 (0.65 – 1.02)<br>p=0.077 | 0.83 (0.66 – 1.03)<br>p=0.095                                                 |
| ≥ 100 mg/dL                    | 144/1813<br>6.9%         | 1.17 (0.93 - 1.46)<br>p=0.178 | 101/1840<br>4.7% | 0.80 (0.62 - 1.02)<br>p=0.073 | 0.69 (0.53 - 0.89)<br>p=0.005                                                 |

Measure of interaction on additive scale: Relative excess risk due to interaction (RERI) (95% CI): -0.19 (-0.52 to 0.15), p=0.27

Measure of interaction on multiplicative scale: ratio of hazard ratios (95% CI) = 0.83 (0.59 to 1.17), p=0.30

The primary outcome was the first occurrence of myocardial infarction, acute coronary syndrome, stroke, heart failure, or death from cardiovascular causes. CI=confidence interval, HR=Hazard Ratio

SUPPLEMENTARY DATA

Supplementary Table 4. Incidence and hazard ratios for serious adverse events by treatment arm among those with normoglycemia and prediabetes at baseline

| Outcome                                  | Baseline fasting serum glucose      |                                    |                          |                                     |                                    |                          | P-value for Interaction |
|------------------------------------------|-------------------------------------|------------------------------------|--------------------------|-------------------------------------|------------------------------------|--------------------------|-------------------------|
|                                          | Normoglycemia<br><100 mg/dL         |                                    |                          | Prediabetes<br>≥ 100 mg/dL          |                                    |                          |                         |
|                                          | Intensive<br>Treatment<br>(n=2,721) | Standard<br>Treatment<br>(n=2,704) | Hazard Ratio<br>(95% CI) | Intensive<br>Treatment<br>(n=1,941) | Standard<br>Treatment<br>(n=1,957) | Hazard Ratio<br>(95% CI) |                         |
| <b>All serious adverse events</b>        | 1052 (38.7)                         | 1000 (37.0)                        | 1.06 (0.97 - 1.15)       | 737 (38)                            | 733 (37.5)                         | 1.03 (0.93 - 1.14)       | 0.67                    |
| <b>Conditions of interest</b>            |                                     |                                    |                          |                                     |                                    |                          |                         |
| <b>Serious adverse event only</b>        |                                     |                                    |                          |                                     |                                    |                          |                         |
| Hypotension                              | 61 (2.2)                            | 44 (1.6)                           | 1.33 (0.90 - 1.97)       | 49 (2.5)                            | 22 (1.1)                           | 2.38 (1.43 - 3.95)       | 0.08                    |
| Syncope                                  | 66 (2.4)                            | 46 (1.7)                           | 1.42 (0.97 - 2.07)       | 40 (2.1)                            | 34 (1.7)                           | 1.20 (0.75 - 1.91)       | 0.58                    |
| Bradycardia                              | 51 (1.9)                            | 41 (1.5)                           | 1.20 (0.79 - 1.81)       | 36 (1.9)                            | 32 (1.6)                           | 1.10 (0.67 - 1.78)       | 0.79                    |
| Electrolyte abnormality                  | 88 (3.2)                            | 60 (2.2)                           | 1.45 (1.04 - 2.02)       | 56 (2.9)                            | 47 (2.4)                           | 1.17 (0.79 - 1.74)       | 0.41                    |
| Injurious fall                           | 70 (2.6)                            | 69 (2.6)                           | 1.00 (0.72 - 1.40)       | 35 (1.8)                            | 41 (2.1)                           | 0.91 (0.58 - 1.44)       | 0.75                    |
| AKI or ARF                               | 111 (4.1)                           | 69 (2.6)                           | 1.59 (1.18 - 2.16)       | 82 (4.2)                            | 48 (2.5)                           | 1.69 (1.18 - 2.42)       | 0.81                    |
| <b>ED visit or serious adverse event</b> |                                     |                                    |                          |                                     |                                    |                          |                         |
| Hypotension                              | 92 (3.4)                            | 59 (2.2)                           | 1.49 (1.08 - 2.07)       | 66 (3.4)                            | 34 (1.7)                           | 2.06 (1.36 - 3.13)       | 0.24                    |
| Syncope                                  | 95 (3.5)                            | 68 (2.5)                           | 1.40 (1.03 - 1.92)       | 67 (3.5)                            | 45 (2.3)                           | 1.50 (1.020 - 2.2)       | 0.79                    |
| Bradycardia                              | 59 (2.2)                            | 48 (1.8)                           | 1.19 (0.81 - 1.75)       | 45 (2.3)                            | 35 (1.8)                           | 1.33 (0.85 - 2.08)       | 0.72                    |
| Electrolyte abnormality                  | 102 (3.7)                           | 70 (2.6)                           | 1.45 (1.07 - 1.97)       | 75 (3.9)                            | 59 (3.0)                           | 1.29 (0.91 - 1.82)       | 0.62                    |
| Injurious fall                           | 206 (7.6)                           | 207 (7.7)                          | 0.97 (0.80 - 1.18)       | 128 (6.6)                           | 125 (6.4)                          | 1.05 (0.82 - 1.35)       | 0.64                    |
| AKI or ARF                               | 117 (4.3)                           | 71 (2.6)                           | 1.64 (1.22 - 2.20)       | 87 (4.5)                            | 49 (2.5)                           | 1.74 (1.22 - 2.48)       | 0.79                    |
| <b>Monitored Clinical Events</b>         |                                     |                                    |                          |                                     |                                    |                          |                         |
| <b>Adverse laboratory measures</b>       |                                     |                                    |                          |                                     |                                    |                          |                         |
| Serum sodium <130 mmol/liter             | 116 (4.3)                           | 60 (2.2)                           | 1.81 (1.32 - 2.5)        | 64 (3.3)                            | 40 (2)                             | 1.64 (1.08 - 2.48)       | 0.70                    |
| Serum sodium >150 mmol/liter             | 3 (0.1)                             | 0 (0)                              | -                        | 3 (0.2)                             | 0 (0)                              | -                        | -                       |
| Serum potassium <3.0 mmol/liter          | 57 (2.1)                            | 43 (1.6)                           | 1.16 (0.77 - 1.74)       | 57 (2.9)                            | 31 (1.6)                           | 1.84 (1.16 - 2.92)       | 0.14                    |
| Serum potassium >5.5 mmol/liter          | 104 (3.8)                           | 111 (4.1)                          | 0.89 (0.68 - 1.18)       | 72 (3.7)                            | 60 (3.1)                           | 1.37 (0.95 - 1.98)       | 0.07                    |
| <b>Orthostatic hypotension</b>           |                                     |                                    |                          |                                     |                                    |                          |                         |
| Alone                                    | 448 (16.5)                          | 513 (19)                           | 0.82 (0.72 - 0.94)       | 328 (16.9)                          | 340 (17.4)                         | 0.94 (0.8 - 1.1)         | 0.22                    |
| With dizziness                           | 43 (1.6)                            | 41 (1.5)                           | 0.91 (0.59 - 1.43)       | 19 (1)                              | 30 (1.5)                           | 0.52 (0.29 - 0.96)       | 0.15                    |

A serious adverse event was defined as an event that was fatal or life-threatening, that resulted in clinically significant or persistent disability, that required or prolonged a hospitalization, or that was judged by the investigator to represent a clinically significant hazard or harm to the participant that might require medical or surgical intervention to prevent one of the other events listed above. An injurious fall was defined as a fall that resulted in evaluation in an emergency department or that resulted in hospitalization. Acute kidney injury or acute renal failure were coded if the diagnosis was listed in the hospital discharge summary and was believed by the safety officer to be one of the top three reasons for admission or continued hospitalization. A few cases of acute kidney injury were noted in an emergency department if the participant presented for one of the other conditions of interest. Adverse laboratory measures were detected on routine or unscheduled tests; routine laboratory tests were performed at 1 month, then quarterly during the first year, then every 6 months. Orthostatic hypertension was defined as a drop in systolic blood pressure of at least 20 mm Hg or in diastolic blood pressure of at least 10 mm Hg at 1 minute after the participant stood up, as compared with the value obtained when the participant was seated. Standing blood pressures were measured at screening, baseline, 1 month, 6 months, 12 months, and yearly thereafter. Participants were asked if they felt dizzy at the time the orthostatic measure was taken.

SUPPLEMENTARY DATA

Supplementary Table 5. Sensitivity analysis excluding those with baseline fasting serum glucose  $\geq 100$  and year 2 fasting serum glucose of  $< 100$  mg/dL (n=1044 excluded)

| Outcome                   | Baseline fasting serum glucose   |                                 |                          |                                  |                                 |                          | P Value for Interaction |
|---------------------------|----------------------------------|---------------------------------|--------------------------|----------------------------------|---------------------------------|--------------------------|-------------------------|
|                           | Normoglycemia<br>< 100 mg/dL     |                                 |                          | Prediabetes<br>$\geq 100$ mg/dL  |                                 |                          |                         |
|                           | Intensive Treatment<br>(n=2,721) | Standard Treatment<br>(n=2,704) | Hazard Ratio<br>(95% CI) | Intensive Treatment<br>(n=1,452) | Standard Treatment<br>(n=1,402) | Hazard Ratio<br>(95% CI) |                         |
| Primary outcome           | 142 (1.7)                        | 174 (2.1)                       | 0.83 (0.66,1.03)         | 77 (1.7)                         | 110 (2.5)                       | 0.66 (0.49,0.89)         | 0.25                    |
| <b>Secondary outcomes</b> |                                  |                                 |                          |                                  |                                 |                          |                         |
| Myocardial infarction     | 57 (0.7)                         | 72 (0.8)                        | 0.80 (0.56,1.14)         | 31 (0.7)                         | 32 (0.7)                        | 0.98 (0.59,1.61)         | 0.62                    |
| Acute coronary syndrome   | 23 (0.3)                         | 17 (0.2)                        | 1.32 (0.71,2.51)         | 14 (0.3)                         | 15 (0.3)                        | 0.95 (0.45,2.02)         | 0.54                    |
| Stroke                    | 36 (0.4)                         | 32 (0.4)                        | 1.19 (0.73,1.92)         | 20 (0.4)                         | 33 (0.7)                        | 0.62 (0.35,1.09)         | 0.08                    |
| Heart failure             | 37 (0.4)                         | 52 (0.6)                        | 0.72 (0.47,1.1)          | 17 (0.4)                         | 36 (0.8)                        | 0.4 (0.22,0.71)          | 0.13                    |
| Death from CVD causes     | 21 (0.2)                         | 37 (0.4)                        | 0.62 (0.35,1.05)         | 14 (0.3)                         | 23 (0.5)                        | 0.58 (0.29,1.13)         | 0.80                    |
| Death from any cause      | 89 (1)                           | 125 (1.4)                       | 0.71 (0.54,0.94)         | 58 (1.2)                         | 68 (1.5)                        | 0.81 (0.56,1.15)         | 0.63                    |
| Primary outcome or death  | 197 (2.3)                        | 240 (2.9)                       | 0.82 (0.68,0.99)         | 107 (2.3)                        | 142 (3.3)                       | 0.71 (0.55,0.92)         | 0.37                    |

Numbers are counts and annual rates. The primary outcome was the first occurrence of myocardial infarction, acute coronary syndrome, stroke, heart failure, or death from cardiovascular causes. CVD=cardiovascular disease, CI= Confidence interval.



SUPPLEMENTARY DATA

Supplementary Table 6. Sensitivity analysis excluding those blood sample was recorded as not fasting at the time of the blood draw by study staff (n=580 excluded).

| Outcome                   | Baseline fasting serum glucose   |                                 |                          |                                  |                                  |                          | P Value for Interaction |
|---------------------------|----------------------------------|---------------------------------|--------------------------|----------------------------------|----------------------------------|--------------------------|-------------------------|
|                           | Normoglycemia<br>< 100 mg/dL     |                                 |                          | Prediabetes<br>≥ 100 mg/dL       |                                  |                          |                         |
|                           | Intensive Treatment<br>(n=2,547) | Standard Treatment<br>(n=2,539) | Hazard Ratio<br>(95% CI) | Intensive Treatment<br>(n=1,834) | Standard Treatment<br>(n=1,1823) | Hazard Ratio<br>(95% CI) |                         |
| Primary outcome           | 126 (1.6)                        | 161 (2.0)                       | 0.80 (0.63,1.01)         | 96 (1.7)                         | 129 (2.3)                        | 0.73 (0.56,0.95)         | 0.62                    |
| <b>Secondary outcomes</b> |                                  |                                 |                          |                                  |                                  |                          |                         |
| Myocardial infarction     | 49 (0.6)                         | 66 (0.8)                        | 0.75 (0.51,1.08)         | 38 (0.6)                         | 37 (0.6)                         | 1.04 (0.66,1.65)         | 0.31                    |
| Acute coronary syndrome   | 22 (0.3)                         | 16 (0.2)                        | 1.37 (0.72,2.66)         | 16 (0.3)                         | 23 (0.4)                         | 0.70 (0.36,1.33)         | 0.17                    |
| Stroke                    | 29 (0.4)                         | 31 (0.4)                        | 0.99 (0.59,1.65)         | 25 (0.4)                         | 30 (0.5)                         | 0.87 (0.51,1.48)         | 0.70                    |
| Heart failure             | 32 (0.4)                         | 50 (0.6)                        | 0.65 (0.41,1.01)         | 24 (0.4)                         | 42 (0.7)                         | 0.51 (0.3,0.84)          | 0.49                    |
| Death from CVD causes     | 21 (0.3)                         | 33 (0.4)                        | 0.70 (0.39,1.20)         | 14 (0.2)                         | 25 (0.4)                         | 0.52 (0.26,0.99)         | 0.49                    |
| Death from any cause      | 82 (1.0)                         | 116 (1.4)                       | 0.71 (0.53,0.95)         | 59 (1.0)                         | 77 (1.3)                         | 0.76 (0.54,1.07)         | 0.79                    |
| Primary outcome or death  | 177 (2.2)                        | 223 (2.8)                       | 0.80 (0.65,0.97)         | 125 (2.2)                        | 164 (2.9)                        | 0.75 (0.59,0.95)         | 0.68                    |

Numbers are counts and annual rates. The primary outcome was the first occurrence of myocardial infarction, acute coronary syndrome, stroke, heart failure, or death from cardiovascular causes. CVD=cardiovascular disease, CI= Confidence interval.

SUPPLEMENTARY DATA

Supplementary Table 7. Sensitivity analysis excluding those with baseline serum fasting glucose  $\geq 126$  (n=295).

| Outcome                   | Baseline fasting serum glucose   |                                 |                          |                                  |                                 |                          | P Value for Interaction |
|---------------------------|----------------------------------|---------------------------------|--------------------------|----------------------------------|---------------------------------|--------------------------|-------------------------|
|                           | Normoglycemia<br>< 100 mg/dL     |                                 |                          | Prediabetes<br>$\geq 100$ mg/dL  |                                 |                          |                         |
|                           | Intensive Treatment<br>(n=2,721) | Standard Treatment<br>(n=2,704) | Hazard Ratio<br>(95% CI) | Intensive Treatment<br>(n=1,791) | Standard Treatment<br>(n=1,812) | Hazard Ratio<br>(95% CI) |                         |
| Primary outcome           | 142 (1.7)                        | 174 (2.1)                       | 0.83 (0.66 - 1.03)       | 92 (1.6)                         | 134 (2.4)                       | 0.68 (0.52 - 0.88)       | 0.26                    |
| <b>Secondary outcomes</b> |                                  |                                 |                          |                                  |                                 |                          |                         |
| Myocardial infarction     | 57 (0.7)                         | 72 (0.8)                        | 0.80 (0.57 - 1.14)       | 34 (0.6)                         | 40 (0.7)                        | 0.88 (0.56 - 1.4)        | 0.75                    |
| Acute coronary syndrome   | 23 (0.3)                         | 17 (0.2)                        | 1.32 (0.70 - 2.47)       | 17 (0.3)                         | 22 (0.4)                        | 0.79 (0.41 - 1.5)        | 0.26                    |
| Stroke                    | 36 (0.4)                         | 32 (0.4)                        | 1.19 (0.73 - 1.91)       | 25 (0.4)                         | 34 (0.6)                        | 0.77 (0.46 - 1.3)        | 0.24                    |
| Heart failure             | 37 (0.4)                         | 52 (0.6)                        | 0.72 (0.47 - 1.1)        | 23 (0.4)                         | 46 (0.8)                        | 0.45 (0.27 - 0.75)       | 0.17                    |
| Death from CVD causes     | 21 (0.2)                         | 37 (0.4)                        | 0.62 (0.36 - 1.06)       | 13 (0.2)                         | 25 (0.4)                        | 0.49 (0.25 - 0.96)       | 0.60                    |
| Death from any cause      | 89 (1.0)                         | 125 (1.4)                       | 0.71 (0.54 - 0.94)       | 56 (1.0)                         | 78 (1.3)                        | 0.72 (0.51 - 1.02)       | 0.96                    |
| Primary outcome or death  | 197 (2.3)                        | 240 (2.9)                       | 0.82 (0.68 - 0.99)       | 122 (2.1)                        | 169 (3.0)                       | 0.72 (0.57 - 0.91)       | 0.39                    |

Numbers are counts and annual rates. The primary outcome was the first occurrence of myocardial infarction, acute coronary syndrome, stroke, heart failure, or death from cardiovascular causes. CVD=cardiovascular disease, CI= Confidence interval.

SUPPLEMENTARY DATA

Supplementary Table 8. Primary and secondary outcomes stratified by quartile of baseline fasting serum glucose and by treatment arm

| Outcome                  | Fasting Serum Glucose Quartile, mg/dL | Intensive Arm |        |            | Standard Arm |        |            | Intensive vs. Standard |              |              | Interaction P-value |
|--------------------------|---------------------------------------|---------------|--------|------------|--------------|--------|------------|------------------------|--------------|--------------|---------------------|
|                          |                                       | N             | Events | % per Year | N            | Events | % per Year | HR                     | Lower 95% CL | Upper 95% CL |                     |
| Primary Outcome          | Q1                                    | 1357          | 71     | 1.7        | 1280         | 69     | 1.7        | 0.98                   | 0.7          | 1.37         | 0.29                |
|                          | Q2                                    | 1050          | 49     | 1.5        | 1099         | 84     | 2.5        | 0.62                   | 0.43         | 0.89         |                     |
|                          | Q3                                    | 1108          | 62     | 1.8        | 1187         | 84     | 2.3        | 0.8                    | 0.58         | 1.12         |                     |
|                          | Q4                                    | 1147          | 61     | 1.7        | 1095         | 81     | 2.4        | 0.69                   | 0.49         | 0.97         |                     |
| Myocardial Infarction    | Q1                                    | 1357          | 33     | 0.8        | 1280         | 33     | 0.8        | 0.94                   | 0.57         | 1.53         | 0.43                |
|                          | Q2                                    | 1050          | 18     | 0.5        | 1099         | 31     | 0.9        | 0.63                   | 0.35         | 1.15         |                     |
|                          | Q3                                    | 1108          | 25     | 0.7        | 1187         | 24     | 0.6        | 1.21                   | 0.69         | 2.13         |                     |
|                          | Q4                                    | 1147          | 21     | 0.6        | 1095         | 28     | 0.8        | 0.74                   | 0.42         | 1.32         |                     |
| Acute Coronary Syndrome  | Q1                                    | 1357          | 14     | 0.3        | 1280         | 4      | 0.1        | 2.9                    | 0.95         | 8.88         | 0.10                |
|                          | Q2                                    | 1050          | 7      | 0.2        | 1099         | 9      | 0.3        | 0.71                   | 0.26         | 1.94         |                     |
|                          | Q3                                    | 1108          | 11     | 0.3        | 1187         | 12     | 0.3        | 0.98                   | 0.43         | 2.24         |                     |
|                          | Q4                                    | 1147          | 8      | 0.2        | 1095         | 15     | 0.4        | 0.49                   | 0.2          | 1.21         |                     |
| Stroke                   | Q1                                    | 1357          | 17     | 0.4        | 1280         | 10     | 0.2        | 1.55                   | 0.7          | 3.41         | 0.46                |
|                          | Q2                                    | 1050          | 12     | 0.4        | 1099         | 19     | 0.5        | 0.68                   | 0.32         | 1.42         |                     |
|                          | Q3                                    | 1108          | 16     | 0.5        | 1187         | 22     | 0.6        | 0.77                   | 0.4          | 1.49         |                     |
|                          | Q4                                    | 1147          | 17     | 0.5        | 1095         | 19     | 0.5        | 0.84                   | 0.43         | 1.64         |                     |
| Heart Failure            | Q1                                    | 1357          | 16     | 0.4        | 1280         | 20     | 0.5        | 0.81                   | 0.41         | 1.58         | 0.34                |
|                          | Q2                                    | 1050          | 12     | 0.4        | 1099         | 25     | 0.7        | 0.51                   | 0.25         | 1.03         |                     |
|                          | Q3                                    | 1108          | 20     | 0.6        | 1187         | 26     | 0.7        | 0.83                   | 0.46         | 1.51         |                     |
|                          | Q4                                    | 1147          | 14     | 0.4        | 1095         | 29     | 0.8        | 0.41                   | 0.21         | 0.79         |                     |
| Death from CVD causes    | Q1                                    | 1357          | 10     | 0.2        | 1280         | 15     | 0.4        | 0.73                   | 0.33         | 1.64         | 0.87                |
|                          | Q2                                    | 1050          | 8      | 0.2        | 1099         | 21     | 0.6        | 0.45                   | 0.19         | 1.05         |                     |
|                          | Q3                                    | 1108          | 7      | 0.2        | 1187         | 13     | 0.3        | 0.64                   | 0.25         | 1.62         |                     |
|                          | Q4                                    | 1147          | 12     | 0.3        | 1095         | 15     | 0.4        | 0.66                   | 0.3          | 1.45         |                     |
| Death from any cause     | Q1                                    | 1357          | 44     | 1          | 1280         | 57     | 1.4        | 0.74                   | 0.5          | 1.1          | 0.78                |
|                          | Q2                                    | 1050          | 36     | 1          | 1099         | 60     | 1.7        | 0.64                   | 0.42         | 0.98         |                     |
|                          | Q3                                    | 1108          | 29     | 0.8        | 1187         | 35     | 0.9        | 0.89                   | 0.54         | 1.48         |                     |
|                          | Q4                                    | 1147          | 45     | 1.2        | 1095         | 57     | 1.6        | 0.68                   | 0.45         | 1.02         |                     |
| Primary outcome or death | Q1                                    | 1357          | 98     | 2.3        | 1280         | 105    | 2.6        | 0.88                   | 0.67         | 1.17         | 0.60                |
|                          | Q2                                    | 1050          | 73     | 2.2        | 1099         | 110    | 3.2        | 0.7                    | 0.51         | 0.94         |                     |
|                          | Q3                                    | 1108          | 74     | 2.1        | 1187         | 98     | 2.6        | 0.81                   | 0.6          | 1.11         |                     |
|                          | Q4                                    | 1147          | 86     | 2.4        | 1095         | 109    | 3.2        | 0.7                    | 0.52         | 0.94         |                     |

Numbers are counts and annual rates. The primary outcome was the first occurrence of myocardial infarction, acute coronary syndrome, stroke, heart failure, or death from cardiovascular causes. CVD=cardiovascular disease, CL= Confidence limit.

Quartile 1 (Q1) = ≤91 mg/dL, Quartile 2 (Q2) =92-97 mg/dL, Quartile 3 (Q3) = 98-105 mg/dL, Quartile 4 (Q4) ≥106mg/dL

## SUPPLEMENTARY DATA

### SPRINT PUBLICATIONS ACKNOWLEDGMENT LONG LIST

**Study Leadership:** Paul Whelton (Chair), Karen C. Johnson (Vice-Chair), Lawrence Fine (Project Officer), Joni Snyder (Deputy Project Officer).

**Program Office: National Institutes of Health, Bethesda, Maryland:** Diane Bild (Project Scientist), Denise Bonds (Project Scientist), Nakela Cook (Project Scientist), Jeffrey Cutler (Project Scientist), Lawrence Fine (Project Officer), Peter Kaufmann (Project Scientist), Paul Kimmel (Project Scientist), Lenore Launer (Project Scientist), Claudia Moy (Project Scientist), William Riley (Project Scientist), Laurie Ryan (Project Scientist), Joni Snyder (Deputy Project Officer), Eser Tolunay (Project Scientist), Song Yang (Biostatistician)

**SPRINT Clinical Center Networks: Case Western Reserve University, Cleveland, OH:** Jackson T Wright Jr (CCN PI), Mahboob Rahman (CCN Co-PI), Alan J Lerner (CCN MIND PI), Mahboob Rahman (CCN Co-PI), Carolyn Still (CCN Project Manager, Co-I), Alan Wiggers (Co-I), Sara Zamanian, (CCN Asst. Project Manager), Alberta Bee (former CCN Asst. Project Manager), Renee Dancie (former CCN Project Manager); **Memphis Veteran Affairs Medical Center, Memphis, TN:** William Cushman (PI), Barry Wall (Co-I), Linda Nichols (MIND PI), Robert Burns (MIND Consultant), Jennifer Martindale-Adams (MIND Consultant), Dan Berlowitz (Economic & HRQL Consultant), Elizabeth Clark (CCN Coordinator), Sandy Walsh (CCN Coordinator) Terry Geraci (CCN Coordinator) Carol Huff (Budget Analyst), Linda Shaw (CCN Research Assistant). **University of Alabama, Birmingham, AL:** Suzanne Oparil (PI), Cora E. Lewis (Co-PI), Virginia Bradley (MIND Co-I), David Calhoun (Co-I), Stephen Glasser (Co-I), Kim Jenkins (CCN Coordinator), Tom Ramsey (CCN Coordinator); **University of Utah, Salt Lake City, UT:** Alfred K. Cheung (PI), Srinivasan Beddhu (Co-I), Gordon Chelune (MIND Co-I), Jeffrey Childs (Associate Director of Operations), Lisa Gren (Director of Operations), Anne Randall (CCN Coordinator); **Wake Forest University Health Sciences, Winston-Salem, NC:** Michael Rocco (PI), David Goff (Co-PI), Carlos Rodriguez (Co-I), Laura Coker (Co-I), Amret Hawfield (Co-I), Joseph Yeboah (Co-I), Lenore Crago (CCN Coordinator) John Summerson (CCN Coordinator), Anita Hege (MIND Coordinator).

**SPRINT Central Coordinating Center: Wake Forest University Health Sciences, Winston-Salem, NC:** David Reboussin (PI), Jeff Williamson (Co-PI), Walter Ambrosius (Co-I), William Applegate (Co-I), Greg Evans (Co-I), Capri Foy (Co-I), Barry I. Freedman (Co-I), Dalane Kitzman (Co-I), Mary Lyles (Co-I), Nick Pajewski (Co-I), Steve Rapp (Co-I), Scott Rushing (Co-I), Neel Shah (Co-I), Kaycee M. Sink (Co-I, Safety Officer), Mara Vitolins (Co-I), Lynne Wagenknecht (Co-I), Valerie Wilson (Co-I), Letitia Perdue (Project Coordinator), Nancy Woolard (MIND Project Coordinator), Tim Craven (Biostatistician), Katelyn Garcia (Biostatistician), Sarah Gaussoin (Biostatistician), Laura Lovato (Biostatistician), Jill Newman (Biostatistician), Bobby Amoroso (Programmer), Patty Davis (Programmer), Jason Griffin (Programmer), Darrin Harris (Programmer), Mark King (Programmer), Kathy Lane (Programmer), Wes Roberson (Programmer), Debbie Steinberg (Programmer), Donna Ashford (Project Manager), Phyllis Babcock (Project Manager), Dana Chamberlain (Project Manager), Vickie Christensen (Project Manager), Loretta Cloud (Project Manager), Christy Collins (Project Manager), Delilah Cook (Project Manager), Katherine Currie (Project Manager), Debbie Felton (Project Manager), Stacy Harpe (Project Manager), Marjorie Howard (Project Manager), Michelle Lewis (Project Manager), Pamela Nance (Project Manager), Nicole Puccinelli-Ortega (Project Manager), Laurie Russell (Project Manager), Jennifer Walker (Project Manager), Brenda Craven (former Project Coordinator), Candace Goode (Data Coordinator), Margie Troxler (Fiscal Coordinator), Janet Davis (Administrative Support), Sarah Hutchens (Administrative Support). **WFU CC Publication Acknowledgement:** Wake Forest University Claude D. Pepper Older Americans Independence Center (P30-AG21332).

## SUPPLEMENTARY DATA

**SPRINT Central Laboratory: University of Minnesota Advanced Research and Diagnostic Laboratory:** Anthony A. Killeen (PI), Anna M. Lukkari (coordinator). **Acknowledgement statement:** This project was supported by Award Number **N01-HC-95240**. The content is solely the responsibility of the author and does not reflect the official views of the NHLBI.

**SPRINT Drug Distribution Center: VA Cooperative Studies Program Clinical Research Pharmacy Coordinating Center:** Robert Ringer (PI), Brandi Dillard (coordinator), Norbert Archibeque, (coordinator) Stuart Warren (Co-I), Mike Sather (PI), James Pontzer (programmer), Zach Taylor (programmer).

**SPRINT ECG Reading Center: Epidemiological Cardiology Research Center (EPICARE), Winston Salem, NC:** Elsayed Z Soliman (PI), Zhu-Ming Zhang (Co-I), Yabing Li (coordinator), Chuck Campbell (coordinator), Susan Hensley (coordinator), Julie Hu (coordinator), Lisa Keasler (coordinator), Mary Barr (coordinator), Tonya Taylor (coordinator)

**SPRINT MRI Reading Center: University of Pennsylvania-Philadelphia, PA:**

R. Nick Bryan (PI), Christos Davatzikos (Co-I), Ilya Nasarallah (Co-I), Lisa Desiderio (Project Manager), Mark Elliott (MRI Physicist), Ari Borthakur (MRI Physicist), Harsha Battapady (Data Analyst), Guray Erus ( Postdoctoral Fellow), Alex Smith (Postdoctoral Fellow), Ze Wang (Research Associate), Jimit Doshi (Data Analyst). **SPRINT MRI by site: University of Pennsylvania-Philadelphia, PA:** Raymond Townsend (Clinic PI), Debbie Cohen (Co-I), Yonghong Huan (Co-I), Mark Duckworth (Research Coordinator), Virginia Ford (Research Coordinator), Kelly Sexton (MRI Coordinator). **University Hospital Case Medical Center-Cleveland, OH:** Jackson T. Wright, Jr. (PI), Alan Lerner (Co-I), Mahboob Rahman (Co-I), Carolyn Still (Project Manager), Alberta Bee (Research Coordinator), Debra Lee Stokes, (MRI coordinator), Shonte Smith (MRI coordinator), Jeffrey Sunshine (Site Radiologist), Mark Clampitt (MRI Technologist). **Vanderbilt University:** Seth Smith (MRI Director), Brian Welch (MRI Research Manager), Manus Donahue ( MRI Physicist), Alex Dagley (Researcher Coordinator), Dave Pennell (MRI Technologist), Chris Cannistraci (Imaging Research Specialist), Kristin Merkle (MRI Research Coordinator), Julie Lewis (Clinic PI) Mohammed Sika (Research Coordinator). **University of Miami:** Clinton Wright (Co-I), Mohammad Sabati (MRI Director), Edward Campuzano (Chief MRI Technologist), Hector Martin (MRI Technologist), Andrea Roman (MRI Technologist), Jesus Cruz (MRI Technologist), Natalya Nagornaya (Site Radiologist). **Wake Forest University:** Laura Coker (Co-I), Anita Hege (Project Coordinator), Joseph Maldjian (Site Radiologist), Sandra Kaminsky (MRI Technologist), Debra Fuller (MRI Technologist), Youngkoo Jung (MRI Physicist). **University of Alabama at Birmingham:** Suzanne Oparil (Network PI), Beth Lewis (Co-PI), Virginia Wadley (MIND Co-I), Kim Jenkins (Project Coordinator), Tom Ramsey (Project Coordinator), William Evanochko (MRI Physicist), Glenn Roberson (Site Radiologist), Trina Corbitt (MRI Technologist), William Fisher (MRI Technologist), Cathy Clements (MRI Technologist). **Boston University:** Daniel Weiner (Clinic PI), Andrew Wells (Research Coordinator), Amanda Civiletto (Research Coordinator), Gerard P. Aurigemma (Clinic PI), Noelle Bodkin (Research Coordinator), Alex Norbash (Co-I), Margaret Lavoye (Research Administrator), Andrew Ellison (MRI Technologist), Ronald Killiany (Imaging Center Director), Osama Sakai (Site Radiologist).

## SUPPLEMENTARY DATA

**SPRINT Sub-Committee Chairs: Ancillary Science:** Alfred Cheung, **Design and Analysis:** Walter Ambrosius, **Economic Evaluation/Health Related Quality of Life:** Dan Berlowitz, **Intervention:** William Cushman, **Measurements, Procedures and Quality Control:** Beth Lewis, **Mortality and Morbidity:** Suzanne Oparil, **Presentations and Publications:** Jackson T. Wright, Jr., **Recruitment, Retention and Adherence:** David Goff, **Safety:** Kaycee Sink, **SPRINT MIND:** Jeff Williamson.

**SPRINT Clinical Centers by Network: OHIO Network: Cleveland Clinic Foundation-Cleveland, OH:** George Thomas (PI), (Co-PI), Martin Schreiber, Jr (Co-I), Sankar Dass Navaneethan (Co-I), John Hickner (Co-I), Michael Lioudis (Co-I), Michelle Lard (Co-I), Susan Marczewski (former coordinator), Jennifer Maraschky (coordinator), Martha Colman (former coordinator) Andrea Aaby (coordinator), Stacey Payne (coordinator), Melanie Ramos, (coordinator), Carol Horner (former coordinator). **Louis Stokes Cleveland VA Medical Center-Cleveland, OH:** Mahboob Rahman (PI), Paul Drawz (Co-I), , Pratibha P. Raghavendra (Co-I), Scott Ober (Co-I), Ronda Mourad (Co-I), Muralidhar Pallaki (Co-I), Peter Russo (Co-I), Pratibha Raghavendra, Co-I), Pual Fantauzzo (Co-I), Lisa Tucker (coordinator), Bill Schwing (coordinator). **MetroHealth Medical Center-Cleveland, OH:** John R. Sedor (PI), Edward J. Horwitz (Co-PI), Jeffrey R. Schelling (Co-I), John F. O'Toole (Co-I), Lisa Humbert (coordinator), Wendy Tutolo (coordinator). **North East Ohio Neighborhood Health Center-Cleveland, OH:** Suzanne White (PI), Alishea Gay (Former Co-I), Walter Clark, Jr (former PI), Robin Hughes (coordinator). **University Hospital Case Medical Center-Cleveland, OH:** Mirela Dobre (PI), Jackson T. Wright, Jr. (Co-I), Carolyn H. Still (Co-I), Alberta Bee (coordinator), Monique Williams (coordinator). **The Ohio State University Medical Center, Division of Nephrology and Hypertension-Columbus, OH:** Udayan Bhatt (PI), Lee Hebert (former PI) Anil Agarwal (Co-PI), Melissa Brown Murphy (coordinator), Nicole Ford (former coordinator), Cynthia Stratton (coordinator), Jody Baxter (former coordinator), Alicia A. Lykins (former coordinator), Alison McKinley Neal (former coordinator) Leena Hirmath (former coordinator). **The Ohio State University Medical Center, Division of Endocrine, Diabetes, and Metabolism-Columbus, OH:** Osei Kwame (PI), Kyaw Soe (Co-I), William F. Miser (former Co-PI), Colleen Sagrilla (coordinator), Jan Johnston (coordinator), Amber Anaya (coordinator), Ashley Mintos (coordinator), Angel A. Howell (coordinator), Kelly Rogers (former coordinator), Sara Taylor (former Co-I). **University Hospitals Landerbrook Health Center-Mayfield Height, OH:** Donald Ebersbacher (PI), Lucy Long (coordinator), Beth Bednarchik (coordinator). **University Hospitals Glenridge Office Park-North Royalton, OH:** Alan Wiggers (PI), Lucy Long (coordinator). **University Hospitals Suburban Health-Cleveland, OH:** Adrian Schnall (PI), Jonathan Smith (coordinator), Lori Peysha (coordinator), Lori Peysha (coordinator), Beth Bednarchik (coordinator), Lisa Leach (coordinator), Megan Tribout (coordinator). **University Hospitals Otis Moss Jr. Health Center-Cleveland, OH:** Carla Harwell (PI), Pinkie Ellington (coordinator). **SUNY Downstate Medical Center, New York:** Mary Ann Banerji (PI), Pranav Ghody (Co-I), Melissa Vahideh Rambaud (coordinator). **University of Pennsylvania-Philadelphia, PA:** Raymond Townsend (PI), Debbie Cohen (Co-I), Yonghong Huan (Co-I), Mark Duckworth (former coordinator), Virginia Ford (coordinator), Juliet Leshner (coordinator), Ann Davison (coordinator), Sarah Vander Veen (coordinator). **Temple University-Philadelphia, PA:** Crystal A Gadegbeku (PI), Avi Gillespie (Co-I), Anuradha Paranjape (Co-I), Sandra Amoroso (coordinator), Zoe Pfeffer (coordinator), Sally B. Quinn (coordinator). **Tulane University-New Orleans, LA:** Jiang He (PI), Jing Chen (Co-I), Eva Lustigova (coordinator), Erin Malone (coordinator). **Ochsner Clinic Foundation-New Orleans, LA:** Marie Krousel-Wood (PI), Richard Deichmann (Co-I), Patricia Ronney (Co-I), Susan Muery (coordinator), Donnalee Trapani (coordinator). **CWRU CCN Publication Acknowledgements: CWRU:** This publication was made possible by the Clinical and Translational Science Collaborative of Cleveland, **UL1TR000439** from the National Center for Advancing Translational Sciences (NCATS) component of the National Institutes of Health and NIH roadmap for Medical Research. Its contents are solely the responsibility of the authors and do not necessarily represent the official views of the NIH. **OSU:** The

## SUPPLEMENTARY DATA

project described was supported by Award Number **UL1RR025755** from the National Center for Research Resources. The content is solely the responsibility of the authors and does not necessarily

represent the official views of the National Center for Research Resources or the National Institutes of Health. **U Penn:** The project described was supported by the National Center for Research Resources, Grant UL1RR024134, and is now at the National Center for Advancing Translational Sciences, **Grant UL1TR000003**. The content is solely the responsibility of the authors and does not necessarily represent the official views of the NIH. **SOUTHEAST Network: Georgia Regents University, Augusta, GA:** Matt Diamond (PI), Laura Mulloy (PI), Marcella Hodges (coordinator), Michelle Collins (coordinator), Charlene Weathers (coordinator), Heather Anderson (former coordinator), Emily Stone (former coordinator), Walida Walker (former coordinator). **Carolinas Medical Center, Charlotte, NC:** Andrew McWilliams (PI), Michael Dulin (Co-I), Lindsay Kuhn (Co-PI), Susan Standridge (coordinator), Lindsay Lowe (coordinator), Kelly Everett (coordinator), Kelly Preston (former coordinator), Susan Norton (former coordinator), Silena Gaines (former coordinator). **University of South Carolina, Columbia, SC:** Ali A. Rizvi (PI), Andrew W. Sides (Co-PI), Diamond Herbert (coordinator), Matthew M. Hix (coordinator), Melanie Whitmire (former coordinator (former coordinator), Brittany Arnold (former coordinator), Philip Hutchinson (former coordinator), Joseph Espiritu (former coordinator). **Duke University, Durham, NC:** Mark Feinglos (PI), Eugene Kovalik (Co-PI), Georgianne Gedon-Lipscomb (coordinator), Kathryn Evans (coordinator), Connie Thacker (coordinator), Ronna Zimmer (coordinator), Mary Furst (coordinator), MaryAnn Mason (former coordinator). **East Carolina University, Greenville, NC:** James Powell (PI), Paul Bolin (Co-PI), Junhong Zhang (Co-PI), Mary Pinion (coordinator), Gail Davis (coordinator), Winifred Bryant (former coordinator), Presley Phelps (former coordinator), Connie Garris-Sutton (former coordinator), Beatrice Atkinson (former coordinator). **University of Miami, Miami, FL:** Gabriele Contreras (PI), Maritza Suarez (Co-PI), Ivonne Schulman (Co-PI), Don Koggan (coordinator), Jackie Vassallo (coordinator), Gloria Peruyera (former coordinator). **Wake Forest Nephrology, Winston Salem, NC:** Michael Rocco (PI), Amret Hawfield (Co-PI), Cassandra Bethea (coordinator), Sheri Mayer (coordinator), Laura Gilliam (former coordinator). **Wake Forest Downtown Health Plaza, Winston Salem, NC:** Carolyn Pedley SPRINT Publications Acknowledgment List May, 2016 (PI), Geraldine Zurek (coordinator), Miriam Baird (coordinator), Charles Herring (Pharm D), Mary Martha Smoak (former coordinator). **Wake Forest Geriatrics, Winston Salem, NC:** Julie Williams (PI), Samantha Rogers (Co-PI), Lindsay Gordon (coordinator), Erin Kennedy (coordinator), Beverly Belle (coordinator), Jessica McCorkle-Doomy (former coordinator), Jonathan Adams (former coordinator), Dana Chamberlain (former coordinator). **University of South Florida, Tampa, FL:** Ramon Lopez (PI), Juris Janavs (coordinator). **Emory University, Atlanta, GA:** Frederic Rahbari-Oskoui (PI), Arlene Chapman (former PI), Allen Dollar (former Co-PI), Olubunmi Williams (coordinator), Yoosun Han (former coordinator). **The Mayo Clinic Jacksonville, Jacksonville, FL:** William Haley (PI), Peter Fitzpatrick (Co-PI), Joseph Blackshear (Co-PI), Brian Shapiro (Co-PI), Anna Harrell (coordinator), Arta Palaj (coordinator), Katelyn Henderson (coordinator), Ashley Johnson (former coordinator), Heath Gonzalez (former coordinator), Jermaine Robinson (former coordinator). **Miami VA, Miami, FL:** Leonardo Tamariz (PI), Ivonne Schulman (Co-PI), Jennifer Denizard (coordinator), Rody Barakat (former coordinator), Dhurga Krishnamoorthy (former coordinator). **Pennington Biomedical Research, Baton Rouge, LA:** Frank Greenway (PI), Ron Monce (Co-I), Timothy Church (former PI), Chelsea Hendrick (coordinator), Aimee Yoches (coordinator), Leighanne Sones (coordinator), Markee Baltazar (former coordinator). **Morehouse School of Medicine, Atlanta, GA:** Priscilla Pemu (PI), Connie Jones (coordinator), Derrick Akpalu (coordinator). **UTAH Network: Boston University Medical Center, Boston MA:** Laura Dember (PI), Denise Soares (coordinator). **Henry Ford Hospital, Detroit MI:** Jerry Yee (PI), Kausik Umanath (Co-PI), Naima Ogletree (Sub-I), Schawana Thaxton (Sub-I), Karen Campana (coordinator), Dayna Sheldon (coordinator), Krista MacArthur (coordinator). **Intermountain Health Care, Salt Lake City UT:** J. Brent Muhlestein (PI), Nathan Allred (Co-I), Brian Clements (Co-I), Ritesh Dhar (Co-I), Kent Meredith (Co-I), Viet Le (Co-I), Edward Miner (Co-I), James Orford (Co-I), Erik R. Riessen (Co-I), Becca Ballantyne (coordinator), Ben Chisum (coordinator), Kevin Johnson (coordinator), Dixie Peeler (coordinator). **Stanford University, Palo Alto CA:** Glenn Chertow (PI), Manju Tamura (Co-PI), Tara Chang (Co-I), Kevin Erickson (Co-I), Jenny Shen (Co-I), Randall S. Stafford (Co-I), Gregory Zaharchuk (Co-I), Margareth Del Cid (coordinator), Michelle Dentinger (coordinator), Jennifer

## SUPPLEMENTARY DATA

Sabino (coordinator), Rukmani Sahay (coordinator), Ekaterina (Katie) Telminova (coordinator). **Tufts Medical Center, Boston MA:** Daniel E. Weiner (PI), Mark Sarnak (Co-I), Lily Chan (coordinator), Amanda Civileto (coordinator), Alyson Heath (coordinator), Amy Kantor (coordinator), Priyanka Jain (coordinator), Bethany Kirkpatrick (coordinator), Andrew Well (coordinator), Barry Yuen (coordinator). **University of Colorado, Denver, Denver CO:** Michel Chonchol (PI), Beverly Farmer (coordinator), Heather Farmer (coordinator), Carol Greenwald (coordinator), Mikaela Malaczewski (coordinator). **University of Illinois, Chicago, Chicago IL:** James Lash (PI), Anna Porter (Co-I), Ana Ricardo (Co-I), Robert T. Rosman (Co-I), Janet Cohan (coordinator), Nieves Lopez Barrera (coordinator), Daniel Meslar (coordinator), Patricia Meslar (coordinator). **University of Pittsburgh, Pittsburgh PA:** Margaret (Molly) Conroy (PI), Mark Unruh (PI), Rachel Hess (Co-PI), Manisha Jhamb (Co-I), Holly Thomas (Co-I), Pam Fazio (coordinator), Elle Klixbull (coordinator), Melissa Komlos-Weimer (coordinator), LeeAnne Mandich (coordinator), Tina Vita (coordinator). **University of Texas Southwestern, Dallas TX:** Robert Toto (PI), Peter Van Buren (Co-I), Julia Inrig (Co-I), Martha Cruz (coordinator), Tammy Lightfoot (coordinator), Nancy Wang (coordinator), Lori Webster (coordinator). **University of Utah, Salt Lake City UT:** Srinivasan Beddhu (PI), Kalani Raphael (Co-I), Barry Stults (Co-I), Tahir Zaman (Co-I), Debra Simmons (Co-I), Tooran Lavasani (nurse practitioner), Rebecca Filipowicz (Sr. research analyst), Guo Wei (Sr research analyst), Gracie Mary Miller (coordinator), Jenice Harerra (coordinator), Jeff Christensen (Clinical research assistant), Ajay Giri (Clinical research assistant), Xiaorui Chen (graduate research assistant), Natalie Anderton (graduate research assistant), Arianna Jensen (undergraduate research assistant). **Vanderbilt University, Nashville TN:** Julia Lewis (PI), Anna Burgner (Co-I), Jamie P. Dwyer (Co-I), Gerald Schulman (Co-I), Terri Herrud (coordinator), Ewanda Leavell (coordinator), Tiffany McCray (coordinator), Edwina McNeil-Simaan (coordinator), Munmun Poudel (coordinator), Malia Reed (coordinator), Mohammed Sika (coordinator), Delia Woods (coordinator), Janice L. Zirkenbach (coordinator). **George Washington University, Washington DC:** Dominic S. Raj (PI), Scott Cohen (Co-I), Samir Patel (Co-I), Manuel Velasquez (Co-I), Roshni S. Bastian (coordinator), Maria Wing (coordinator) Akshay Roy-Chaudhury (Coordinator). **University of California, Davis, Sacramento CA:** Thomas Depner (PI), Lorien Dalrymple (Co-I), George Kaysen (Co-I), Susan Anderson (coordinator). **Salt Lake City VA, Salt Lake City UT:** Srinivasan Beddhu (PI), John Nord (Co-I), Debra Simmons (Co-I), Gracie Mary Miller (coordinator), Jenice Harerra (coordinator), Ajay Giri (Clinical research assistant). **Veterans Medical Research Foundation, San Diego CA:** Joachim H. Ix (PI), Leonard Goldenstein (Co-PI), Cynthia M. Miracle (Co-I), Nketi Forbang (coordinator), Maja Mircic (coordinator), Brenda Thomas (coordinator), Tiffany Tran (coordinator). **UCLA, Los Angeles CA:** Anjay Rastogi (PI), Mihae Kim (Sub-PI), Mohamad Rashid (Co-PI), Bianca Lizarraga (coordinator), Amy Hocza (coordinator), Kristine Sarmosyan (coordinator), Jason Norris (coordinator), Tushar Sharma (coordinator), Amanda Chioy (coordinator), Eric Bernard (coordinator), Eleanore Cabrera (coordinator), Christina Lopez (coordinator), Susana Nunez (coordinator), Joseph Riad (coordinator), Suzanne Schweitzer (coordinator), Siran Sirop (coordinator), Sarah Thomas (coordinator), Lauren Wada (coordinator). **Loyola University Medical Center, Chicago IL:** Holly Kramer (PI), Vinod Bansal (Co-PI), Corliss E. Taylor (coordinator). **University of Florida, Gainesville FL:** Mark S. Segal (PI), Karen L. Hall (Co-I), Amir Kazory (Co-I), Lesa Gilbert (coordinator), Linda Owens (coordinator), Danielle Poulton (coordinator), Elaine Whidden (coordinator). **University of Michigan, Ann Arbor MI:** Jocelyn (Jo) Wiggins (PI), Caroline Blaum (PI), Linda Nyquist (Co-I), Lillian Min (Co-I), Tanya Gure (Co-I), Ruth Lewis (coordinator), Jennifer Mawby (coordinator), Eileen Robinson (coordinator). **UTAH CCN Publication Acknowledgments: Boston:** The trial was supported by a CTSA grant **UL1 RR025771**. **Stanford:** Spectrum is part of the Clinical and Translational Science Award (CTSA) program, funded by the National Center for Advancing Translational Sciences (Grant: **UL1 TR000093**) at the National Institutes of Health (NIH). All publications resulting from the use of Spectrum resources must cite this grant number. **Tufts:** The project described was supported by the National Center for Research Resources Grant Number **UL1RR025752** and the National Center for Advancing Translational Sciences, national Institutes of Health, Grant Numbers **UL1 TR000073** and **UL1 TR001064**. The content is solely the responsibility of the authors and does not necessarily represent the official views of the NIH. **University**



## SUPPLEMENTARY DATA

**of Illinois:** The project described was supported by Grant number **UL1TR000050**, Clinical Interface Core. **UT Southwestern:** The current CTSA grant number is **9U54TR000017-06**. University of Texas Southwestern Clinical and Translational Alliance for Research. **University of Utah:** CTSA Grant number is **UL1TR000105-05**. Center for Clinical and Translational Science. **Vanderbilt University:** Research reported in this publication was supported by the National Center for Advancing Translational Sciences of the National Institute of Health under Award Number **UL1 TR000445**. The content is solely the responsibility of the authors and does not necessarily represent the official views of the National SPRINT Publications Acknowledgment List May, 2016 Institutes of Health. Vanderbilt Institute for Clinical and Translational Research (VICTR). **University of CA, Davis:** CTSA Grant number **UL1 TR000002**. National Center for Advancing Translational Sciences. **University of Florida:** This work is supported in part by the NIH/NCATS Clinical and Translational Science Award to the University of Florida, Award Number **UL1 TR000064**; UF Clinical Research Center (UF CRC). **University of Michigan:** This work is supported in part by the Michigan Institute for Clinical and Health Research, Award Number **UL1TR000433**. **UAB Network: Athens Internal Medicine, Athens, AL:** Nauman Qureshi (PI), Karen Ferguson (coordinator), Sumrah Haider (coordinator), Mandy James (coordinator), Christy Jones (coordinator), Kim Renfro (coordinator), April Seay (coordinator), Carrie Weigart (coordinator). **UAB - The Chronic Kidney Disease Clinic, Birmingham, AL:** Denyse Thornley-Brown (PI), Dana Rizik (Co-I), Bari Cotton (coordinator), Meredith Fitz-Gerald (coordinator), Tiffany Grimes (coordinator), Carolyn Johnson (coordinator), Sara Kennedy (coordinator), Chanel Mason (coordinator), Lesa Rosato-Burson (coordinator), Robin Willingham (coordinator). **UAB - Vascular Biology and Hypertension Clinic, Birmingham, AL:** David Calhoun (PI), Eric Judd (Co-I), Tonya Breaux-Shropshire (coordinator), Felice Cook (coordinator), Julia Medina (coordinator). **Nephrology Associates, P.C., Birmingham, AL:** James Lewis (PI), Roman Brantley (Co-I), John Brouillette (Co-I), Jeffrey Glaze (Co-I), Stephanie Hall (Co-I), Nancy Hiott (Co-I), David Tharpe (Co-I), Spencer Boddy (coordinator), Catherine Mack (coordinator). **University of Tennessee Health Science Center, Memphis, TN:** Karen C. Johnson (PI) Catherine Womack (Co -I), Beate Griffin (coordinator), Carol Hendrix (coordinator), Karen Johnson (coordinator), Lisa Jones (coordinator), Chelsea Towers (coordinator). **Punzi Medical Center and Trinity Hypertension Research, Carrollton, TX:** Henry Punzi (PI), Kathy Cassidy (coordinator), Kristin Schumacher (coordinator). **Family Care Practice, Fajardo, Puerto Rico:** Carmen Irizarry (PI), Ilma Colon (coordinator). **Centro Cardiovascular de Caguas, El Verde, Caguas, Puerto Rico:** Pedro Colon-Ortiz (PI), Pedro Colon-Hernandez (Co-I), Merari Carrasquillo (coordinator), Nivea Vazquez (coordinator). **Miguel Sosa-Padilla, Private Practice San Juan, Puerto Rico:** Miguel Sosa-Padilla (PI), Alex Cintron-Pinero (Co-I), Mayra Ayala (coordinator), Olga Pacheco (coordinator), Catalina Rivera (coordinator) Irma Sotomayor-Gonzalez (coordinator). **Altamira Family Practice and Research Institute Center, San Juan, Puerto Rico:** Jamie Claudio (PI), Jose Lazaro (coordinator), Migdalia Arce (coordinator), Lourdes Heres (coordinator), Alba Perez (coordinator). **Centro Clinico San Patricio, San Juan, Puerto Rico:** Jose Tavarez-Valle (PI), Ferlinda Arocho (coordinator), Mercedes Torres (coordinator), Melvaliz Vazquez (coordinator). **University of Massachusetts – Worcester, MA:** Gerard P. Aurigemma (PI), Rebecca Takis-Smith (Co-I), Julia Andrieni (Co-I), Noelle Bodkin (coordinator), Kiran Chaudhary (coordinator), Paula Hu (coordinator). **Rutgers-Robert Wood Johnson Medical School, New Brunswick, New Jersey:** John Kostis (PI), William J. Kostis (Co-PI) Nora Cosgrove (coordinator), Denise Bankowski (coordinator), Monica Boleyn (coordinator), Laurie Casazza (coordinator), Victoria Giresi (coordinator), Tosha Patel (coordinator), Erin Squindo (coordinator), Yan Wu (coordinator). **University of Mississippi Medical Center CRP – Jackson, MS:** Marion Wofford (PI), Michael Flessner (Co-I), Cathy Adair (coordinator). **Nashville Medical Group, Nashville, TN:** Jordan Asher (PI), Debbie Loope (coordinator), Rita Cobb (coordinator), Reiner Venegas (coordinator). **New York Irving Pavilion Research, Columbia University, New York, NY:** Thomas Bigger (Director), Daniel Donovan (PI), Carlos Lopez-Jimenez (Co-I), Amilcar Tirado (coordinator). **New York, Irving Pavilion Research Unit – CTSA Satellite, Columbia University, New York, NY:** Thomas Bigger (Director), Asqual Getaneh (PI), Rocky Tang (coordinator), Sabrina Durant (coordinator). **Clinical Cardiovascular Research Lab for the Elderly, Columbia University, New York, NY:**

## SUPPLEMENTARY DATA

Thomas Bigger (Director), Mathew Maurer (PI), Sergio Teruya (Co-I) Stephen Helmke (coordinator), Julissa Alvarez (coordinator). **Medical University of South Carolina Nephrology, Charleston, SC:** Ruth Campbell (PI), Roberto Pisoni (Co-I), Rachel Sturdivant (Co-I), Caroline Counts (coordinator), Vickie Hunt (coordinator), Lori Spillers (coordinator). **Great Lakes Medical Research, Westfield, NY:** Donald Brautigam (PI), Timothy Kitchen (Co-I), Timothy Gorman (Co-I) Jessica Sayers (coordinator), Sarah Button (coordinator), June Chiarot (coordinator), Rosemary Fischer (coordinator), Melissa Lyon (coordinator), Maria Resnick (coordinator). **VA Network: New Mexico VA Healthcare System – Albuquerque, NM:** Karen Servilla (PI), Darlene Vigil (Co-I), Terry Barrett (coordinator). **Atlanta VAMC – Atlanta GA:** Mary Ellen Sweeney (PI), Rebecca Johnson (Co-I), Susan McConnell (Co-I), Khadijeh Shahid Salles (Co-I), Francoise Watson (Co-I), Cheryl Schenk (coordinator), Laura Whittington (coordinator), Maxine Maher (coordinator). **VA Boston Healthcare System – Jamaica Plain, MA:** Jonathan Williams (PI), Stephen Swartz (PI), Paul Conlin (Co-I), George Alexis (coordinator), Rebecca Lamkin (coordinator), Patti Underwood (coordinator), Helen Gomes (coordinator). **James J. Peters VAMC – Bronx, NY:** Clive Rosendorff (PI), Stephen Atlas (Co-I), Lawrence Kwon (Co-I), Matar Matar (coordinator). **Ralph H. Johnson VAMC – Charleston, SC:** Roberto Pisoni (PI), Jan Basile (PI), Joseph John (PI), Deborah Ham (coordinator), Hadi Baig (coordinator). **Dayton VAMC – Dayton, OH:** Mohammed Saklayen (PI), Jason Yap (Co-I), Helen Neff (coordinator), Carol Miller (coordinator), Ling Zheng-Phelan (coordinator). **John D. Dingell VAMC – Detroit, MI:** Saib Gappy (PI), Shiva Rau (Co-I), Arathi Raman (Co-I), Vicki Berchou (coordinator), Elizabeth Jones (coordinator), Erin Olgren (coordinator). **VA New Jersey Healthcare System – East Orange, NJ:** Michael Yudd (PI), Sithiporn Sastrasinh (PI), Jennine Michaud (Co-I), Jessica Fiore (coordinator), Marianne Kutza (coordinator). **Malcom Randall VAMC – Gainesville, FL:** Ronald Shorr (PI), Rattana Mount (Co-I), Jeremy Thoms (Co-I), Helen Dunn (coordinator), Susan Stinson (coordinator), Jessica Hunter (coordinator). **Michael E. DeBakey VAMC – Houston, TX:** Addison Taylor (PI), Jeffery Bates (Co-I), Catherine Anderson (coordinator). **G.V. (Sonny) Montgomery VAMC – Jackson, MS:** Kent Kirchner (PI), Jodi Stubbs (Co-I), Ardell Hinton (coordinator), Anita (Kaye) Spencer (coordinator). **Kansas City VAMC – Kansas City, MO:** Santosh Sharma (PI), Thomas Wiegmann (PI), Smita Mehta (coordinator). **John L. McClellan Memorial Veterans Hospital – Little Rock, AR:** Michelle Krause (PI), Kate Dishongh (coordinator). **Memphis VAMC – Memphis, TN:** Barry Wall (PI), Richard Childress (Co-I), William Cushman (Co-I), Geeta Gyamlani (Co-I), Atossa Niakan (Co-I), Cathy Thompson (Co-I), Janelle Moody (coordinator). **Clement J. Zablocki VAMC – Milwaukee, WI:** Jeffrey Whittle (PI), Gary Barnas (Co-I), Dawn Wolfgram, (Co-I), Heidi Cortese (coordinator), Jonette Johnson (coordinator). **Nashville VAMC/TVHS-GRECC – Nashville, TN:** Christianne Roumie (PI), Adriana Hung (Co-I), Jennifer Wharton (coordinator), Kurt Niesner (coordinator). **VA New York Harbor Healthcare System – New York, NY:** Lois Katz (PI), Elizabeth Richardson (coordinator), George Brock (coordinator). **Northport VAMC – Northport, NY:** Joanne Holland (PI), Troy Dixon (PI), Athena Zias (Co-I), Christine Spiller (coordinator). **Phoenix VA Healthcare System – Phoenix, AZ:** Penelope Baker (PI), James Felicetta (PI), Shakaib Rehman (Co-I), Kelli Bingham (coordinator). **Portland VAMC – Portland, OR:** Suzanne Watnick (PI), Jessica Weiss (Co-I), Tera Johnston (coordinator). **St. Louis VA Healthcare System – St. Louis, MO:** Stephen Giddings (PI), Andrew Klein (PI), Caroline Rowe (Co-I), Kristin Vargo (coordinator), Kristi Waidmann (coordinator). **Washington, D.C. VAMC – Washington, D.C.:** Vasilios Papademetriou (PI), Jean Pierre Elkhoury (Co-I), Barbara Gregory (coordinator), Susan Amodeo (coordinator), Mary Bloom (coordinator). **West Los Angeles VA Healthcare Center /Greater Los Angeles Healthcare System – Los Angeles, CA:** Dalia Goldfarb-Waysman (PI), Richard Treger (Co-I), Karen Knibloe (coordinator). **Minneapolis VAMC – Minneapolis, MN:** Areef Ishani (PI), Yelena Slinin (Co-I), Christine Olney (coordinator), Jacqueline Rust (coordinator). **Audie L. Murphy Memorial Veterans Hospital – South Texas Veterans Healthcare System – San Antonio, TX:** Paolo Fanti (PI), Shweta Bansal (Co-I), Monica Dunnam (Co-I), Christopher Dyer (Co-I), Lih-Lan Hu (coordinator), Perla Zarate-Abbott (coordinator).
